# Supplementary material for: The Assessment of Water Retention Efficiency of Different Soil Amendments in Comparison to Water Absorbing Geocomposite
Source: MDPI journal article supplement (doi:10.3390/ma14216658), 2021-11-04
Supplement: s1 [file s1]

# The Assessment of Water Retention Efficiency of Different Soil Amendments in Comparison to Water Absorbing Geocomposite

Michał Śpitalniak <sup>1,\*</sup>, Adam Bogacz <sup>2</sup> and Zofia Zięba <sup>3</sup>

**Table S1.** Chemical composition of attapulgite and granular bentonite determined with the use of XRD device.

| Parameter                      | Unit                | Limit of Detection | Attapulgite | Bentonite |
|--------------------------------|---------------------|--------------------|-------------|-----------|
| FeO                            | mg·kg <sup>-1</sup> | 40                 | 17000       | 29000     |
| SiO <sub>2</sub>               | mg·kg <sup>-1</sup> | 0.9                | 420000      | 430000    |
| Al <sub>2</sub> O <sub>3</sub> | mg·kg <sup>-1</sup> | 0.9                | 110000      | 54000     |
| Fe <sub>2</sub> O <sub>3</sub> | mg·kg <sup>-1</sup> | 0.9                | 46000       | 83000     |
| CaO                            | mg·kg <sup>-1</sup> | 0.9                | 99000       | 64000     |
| MgO                            | mg·kg <sup>-1</sup> | 0.9                | 110000      | 22000     |
| Na <sub>2</sub> O              | mg·kg <sup>-1</sup> | 0.9                | 660         | 10000     |
| K <sub>2</sub> O               | mg·kg <sup>-1</sup> | 0.9                | 6100        | 6600      |
| TiO <sub>2</sub>               | mg·kg <sup>-1</sup> | 0.9                | 580         | -         |
| P <sub>2</sub> O <sub>5</sub>  | mg·kg <sup>-1</sup> | 0.9                | 19000       | 2200      |
| Chlorine                       | mg·kg <sup>-1</sup> | 100                | -           | U/S       |
| pH                             | -                   | -                  | 9.1         | 9.3       |
| Total moisture                 | %                   | 0.5                | 5.3         | 5.1       |
| Analytical moisture            | %                   | 0.5                | 4.3         | 2.8       |

**Table S2.** Biochar properties of a dry sample [117].

| Total Moisture (%) | Ash Content (%) | Calorific Value (kJ·kg <sup>-1</sup> ) | Carbon (%) | Total Volatile Fractions (%) | Total Sulphur (%) | Hydrogen (%) | Open Porosity (%) | Specific Surface (m <sup>2</sup> ·g <sup>-1</sup> ) | Density (g·cm <sup>-3</sup> ) |
|--------------------|-----------------|----------------------------------------|------------|------------------------------|-------------------|--------------|-------------------|-----------------------------------------------------|-------------------------------|
| 1.7                | 16.5            | 28 026                                 | 78.00      | 16.5                         | 0.00              | 3.00         | 27.68             | 1.64                                                | 0.71                          |

**Table S3.** Characteristics of the superabsorbent polymer based on producer's information [118].

| Parameter                         | Characteristic                                              |
|-----------------------------------|-------------------------------------------------------------|
| Chemical composition              | Cross-linked copolymer of acrylamide and potassium acrylate |
| Appearance                        | dry: white powder<br>hydrated: transparent gel              |
| Particle size                     | powders, micro granules, granules                           |
| pH                                | 8.10                                                        |
| Dry matter                        | 85%-90%                                                     |
| Apparent density                  | 0.85                                                        |
| Specific weight                   | 1.10 g·cm <sup>-3</sup>                                     |
| Maximum water absorption (w/w)    | 400 in deionised water and 150 in soil                      |
| Water retention capacity at pF1   | 980 ml·l <sup>-1</sup>                                      |
| Water retention capacity at pF4.2 | 95%                                                         |
| Cationic Exchange Capacity (CEC)  | 4.6 meq·g <sup>-1</sup>                                     |
| Effectiveness in soil             | up to 5 years                                               |
| Toxicity in soil                  | none under normal conditions of use                         |

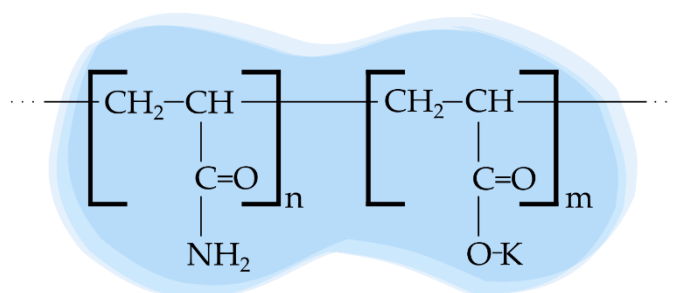

**Figure S1.** Chemical structure of superabsorbent polymer Aquasorb 3005 KL based on producer information [118].

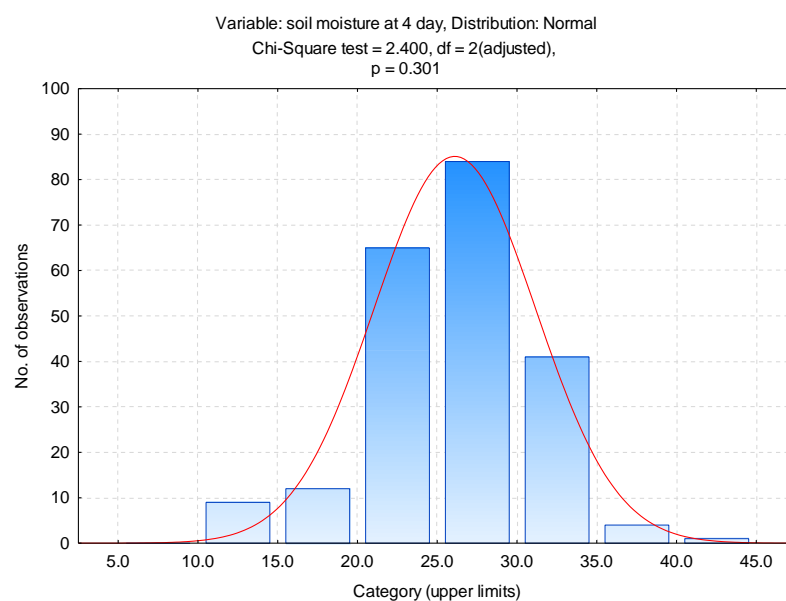

**Figure S2.** Distribution of soil moisture data recorded on the 4<sup>th</sup> day. .

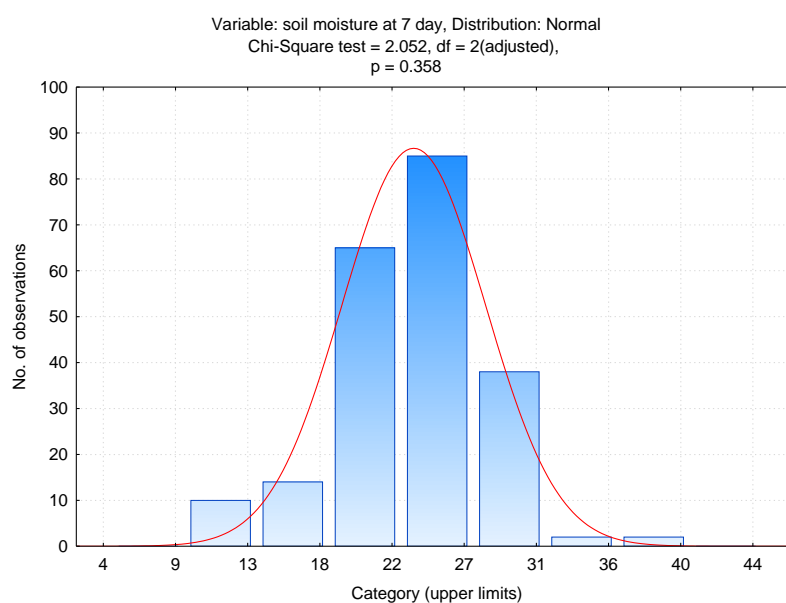

**Figure S3.** Distribution of soil moisture data recorded on the 7<sup>th</sup> day. .

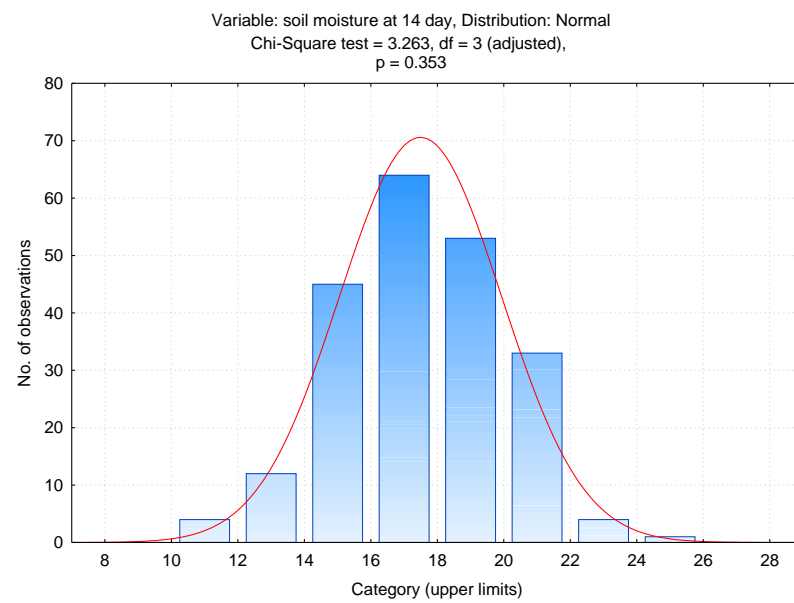

**Figure S4.** Distribution of soil moisture data recorded on the 14<sup>th</sup> day. .

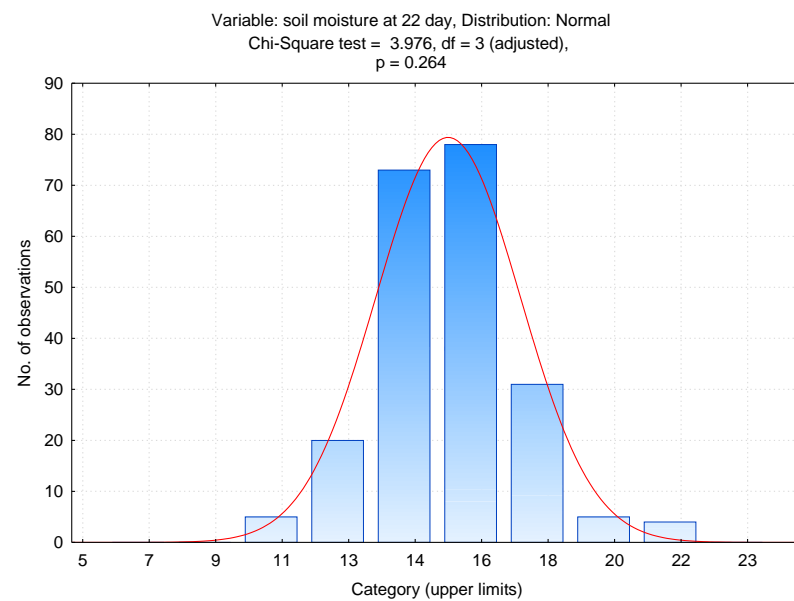

**Figure S5.** Distribution of soil moisture data recorded on the 22<sup>nd</sup> day. .

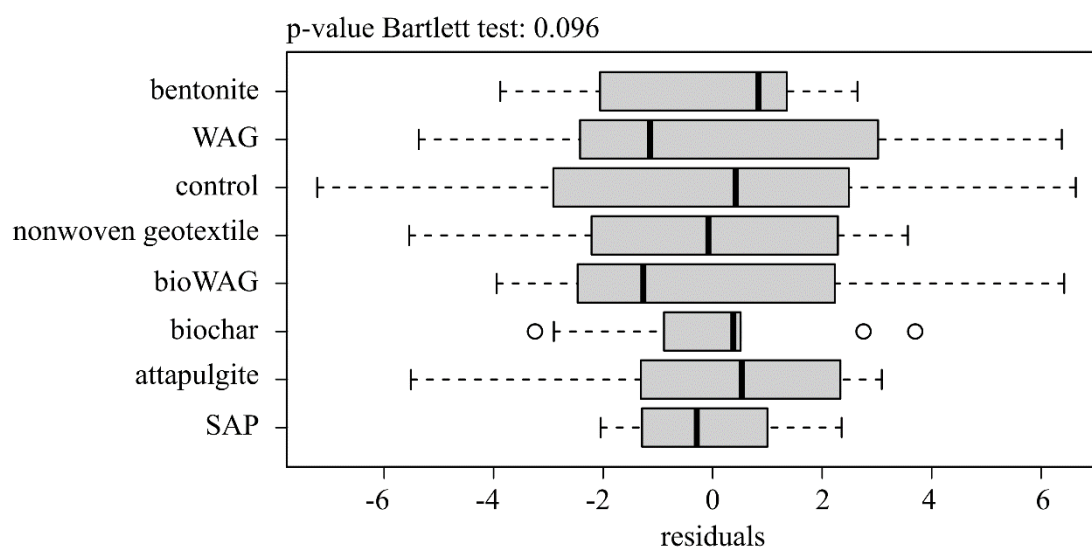

Figure S6. The homoscedasticity of residuals grouped by soil amendments on the 4<sup>th</sup> day.

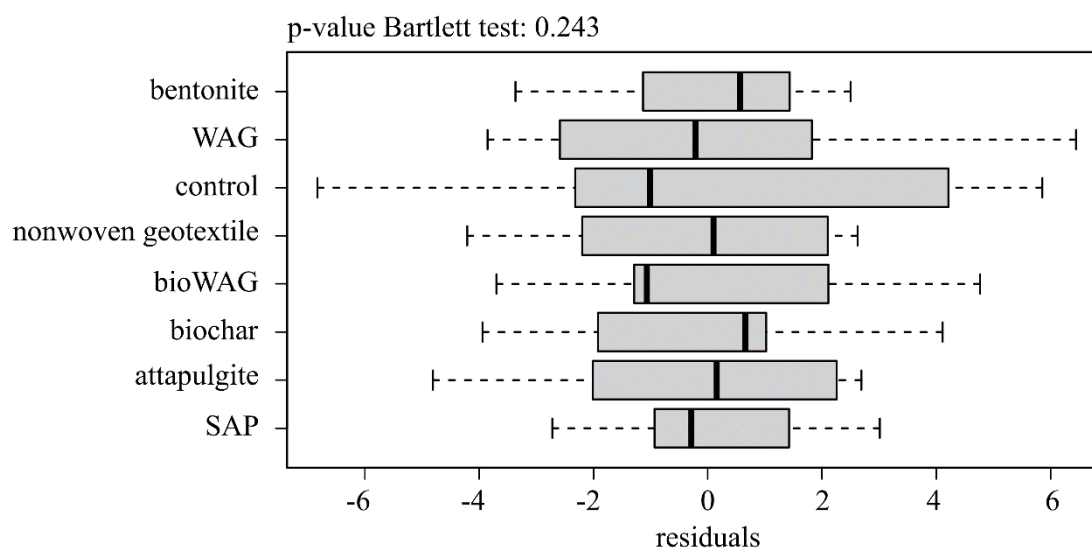

Figure S7. The homoscedasticity of residuals grouped by soil amendments on the 7<sup>th</sup> day.

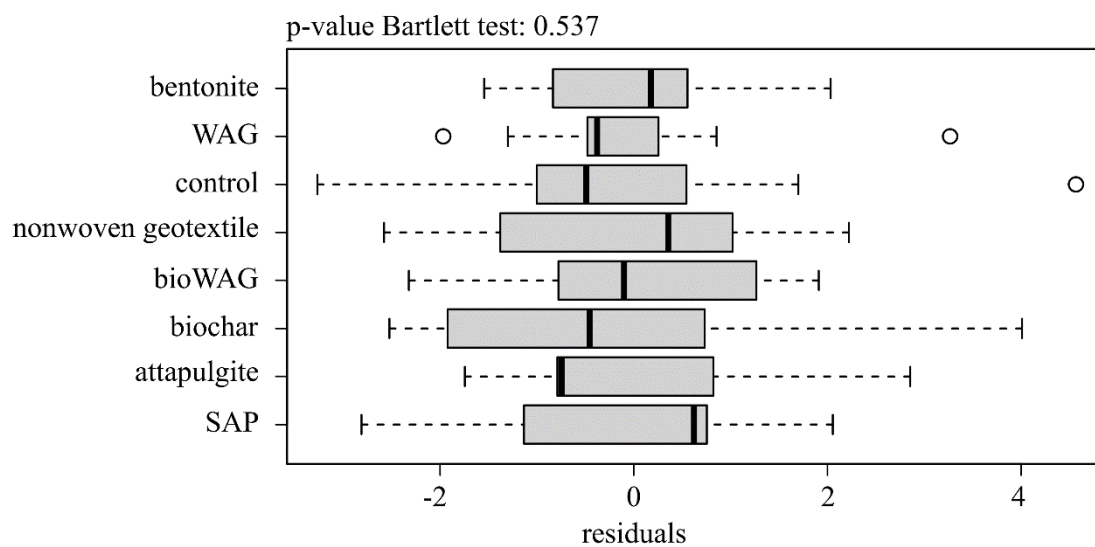

**Figure S8.** The homoscedasticity of residuals grouped by soil amendments on the 14<sup>th</sup> day.

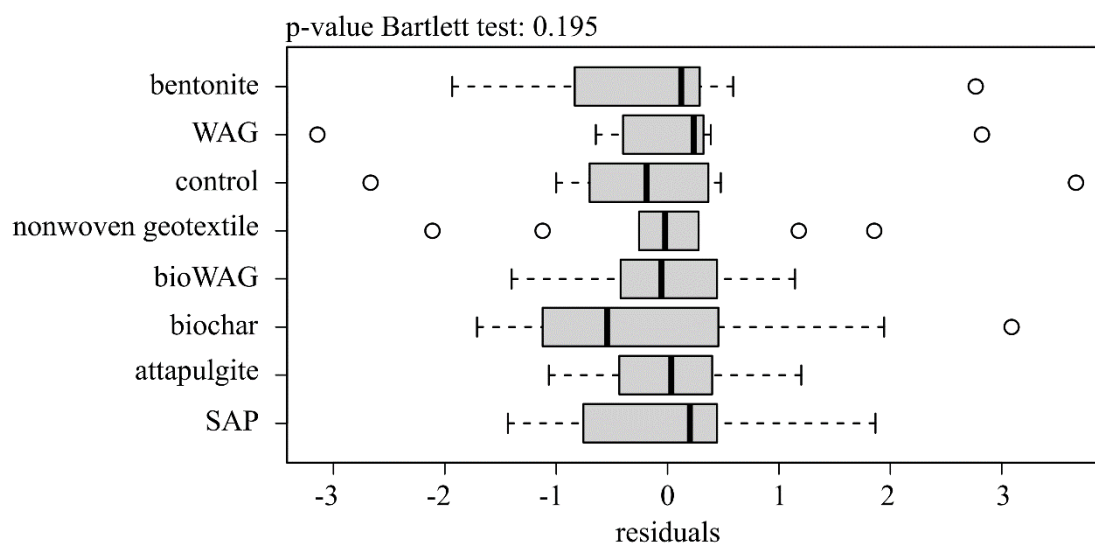

**Figure S9.** The homoscedasticity of residuals grouped by soil amendments on the 22<sup>nd</sup> day.

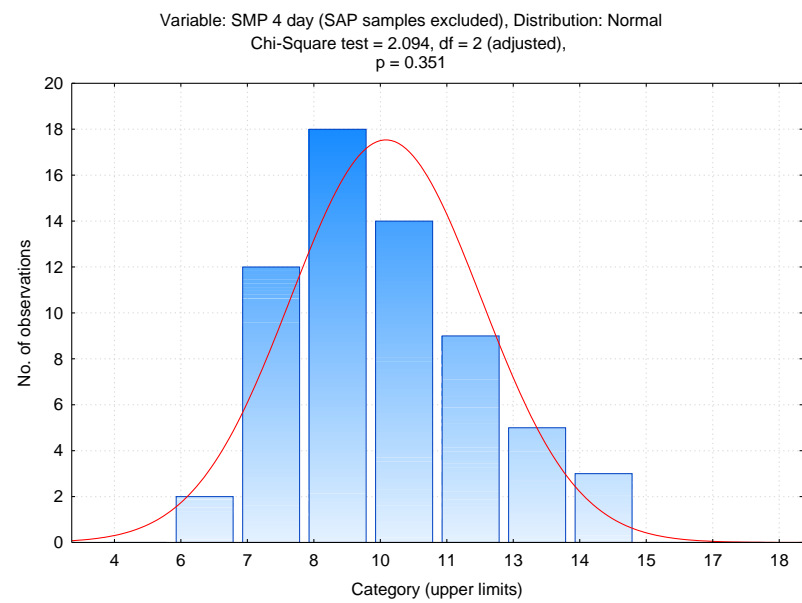

**Figure S10.** Distribution of soil matrix potential (SMP) data recorded on the 4<sup>th</sup> day.

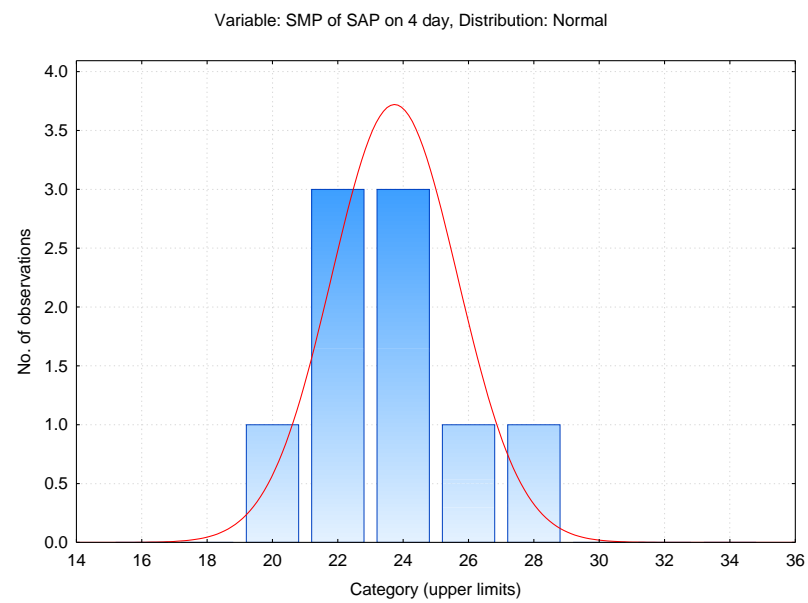

**Figure S11.** Distribution of soil matrix potential (SMP) data of SAP samples recorded on the 4<sup>th</sup> day.

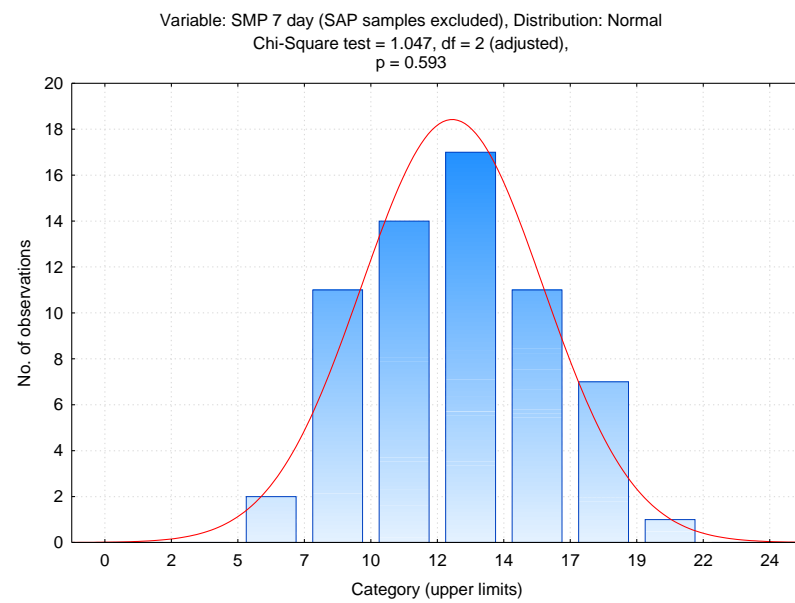

**Figure S12.** Distribution of soil matrix potential (SMP) data recorded on the 7<sup>th</sup> day.

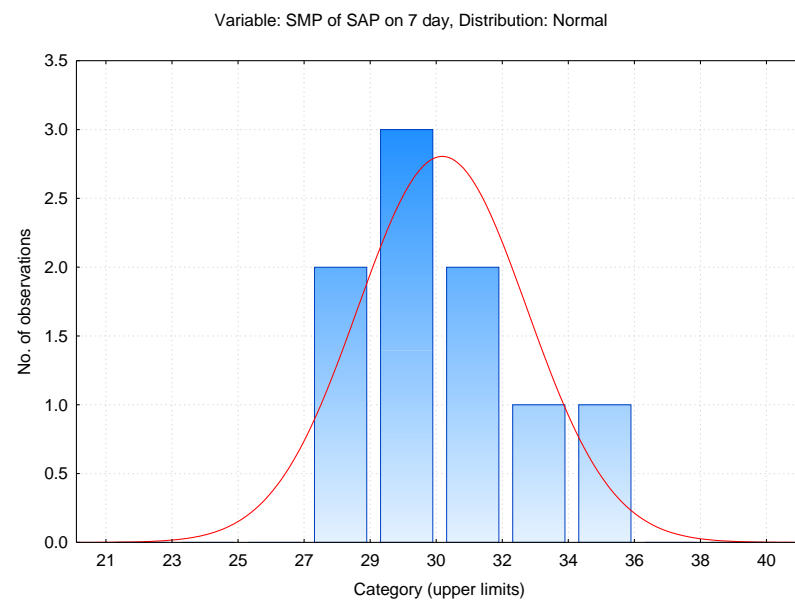

**Figure S13.** Distribution of soil matrix potential (SMP) data of SAP samples recorded on the 4<sup>th</sup> day.

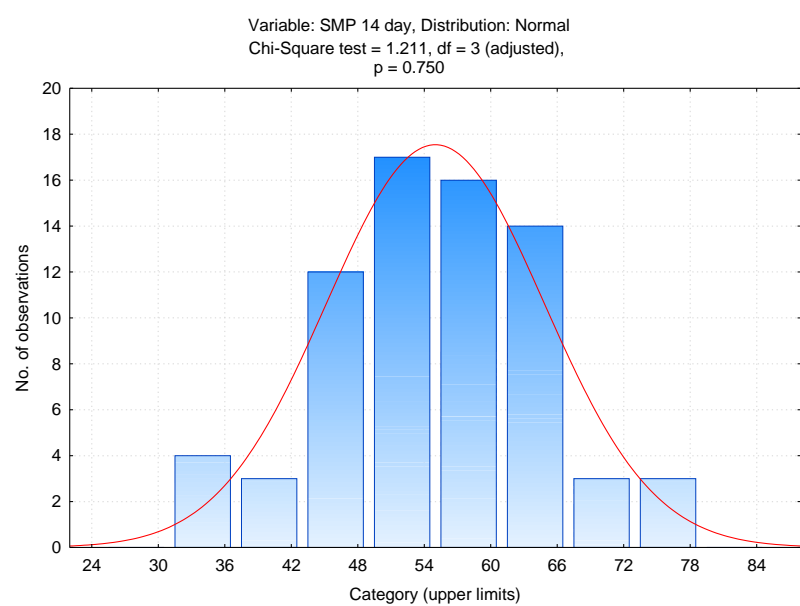

**Figure S14.** Distribution of soil matrix potential (SMP) data recorded on the 14<sup>th</sup> day.

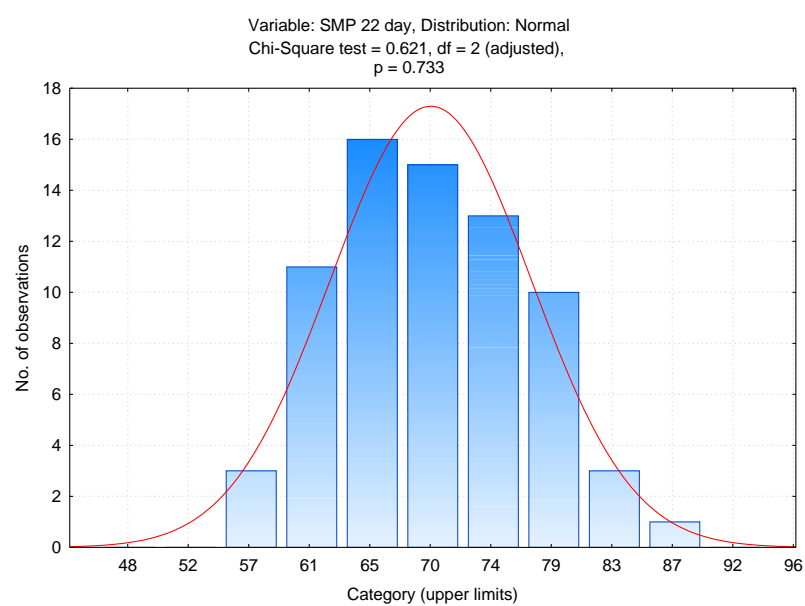

**Figure S15.** Distribution of soil matrix potential (SMP) data recorded on the 22<sup>nd</sup> day.



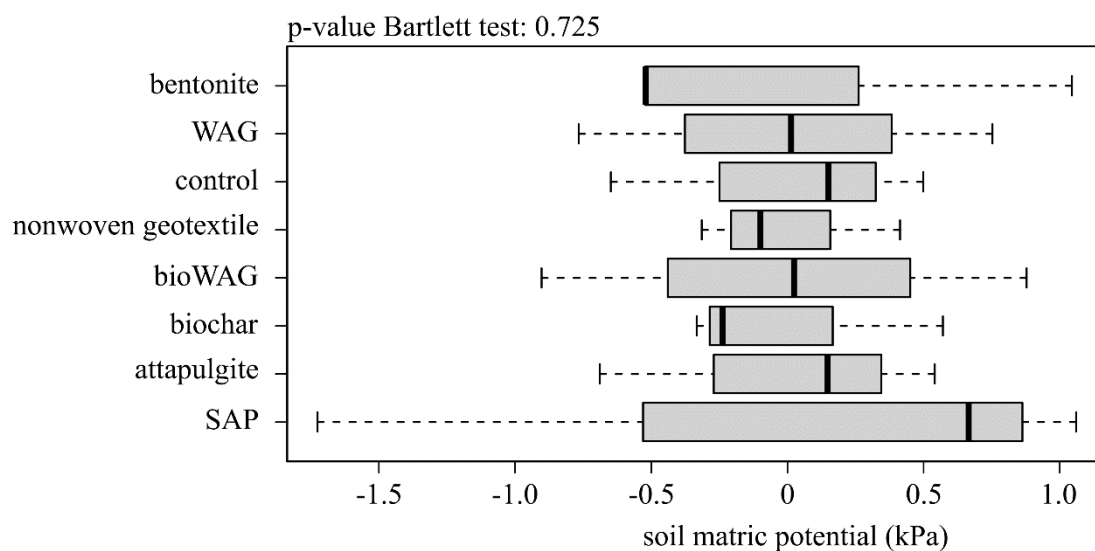

**Figure S16.** The homoscedasticity of residuals grouped by soil amendments on the 4<sup>th</sup> day.

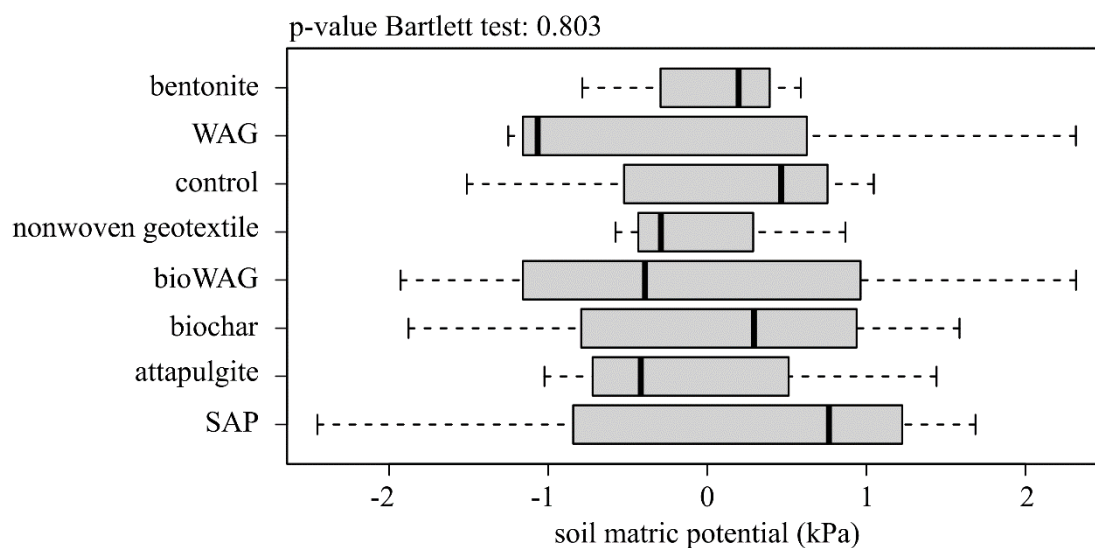

**Figure S17.** The homoscedasticity of residuals grouped by soil amendments on the 7<sup>th</sup> day.

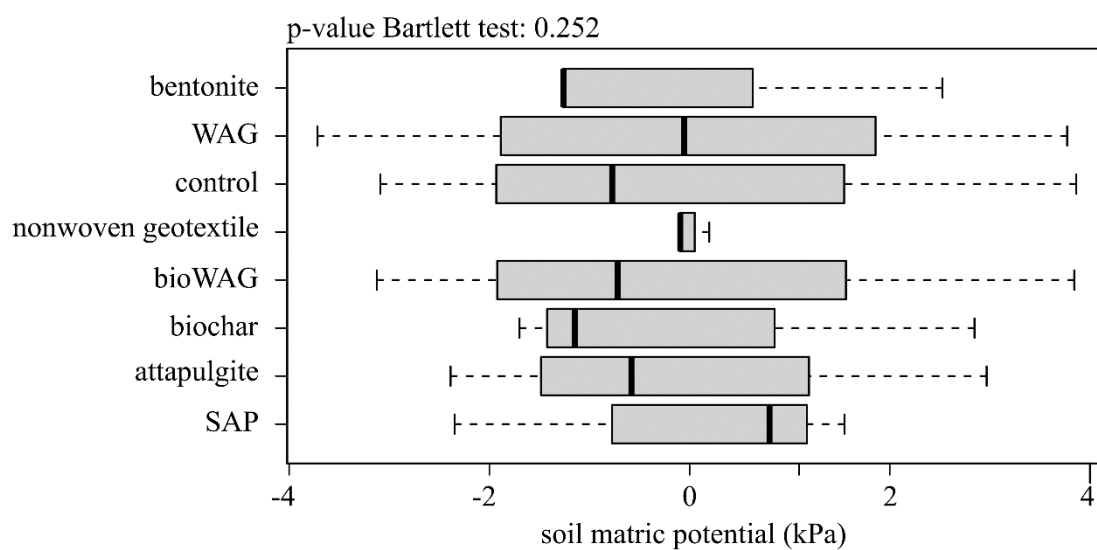

**Figure S18.** The homoscedasticity of residuals grouped by soil amendments on the 14<sup>th</sup> day.

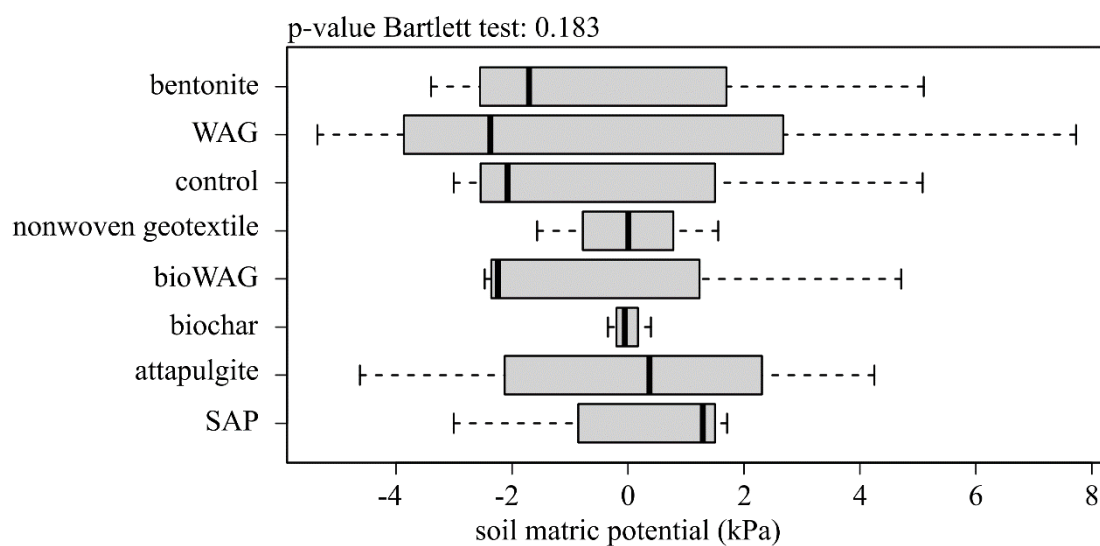

**Figure S19.** The homoscedasticity of residuals grouped by soil amendments on the 22<sup>th</sup> day.

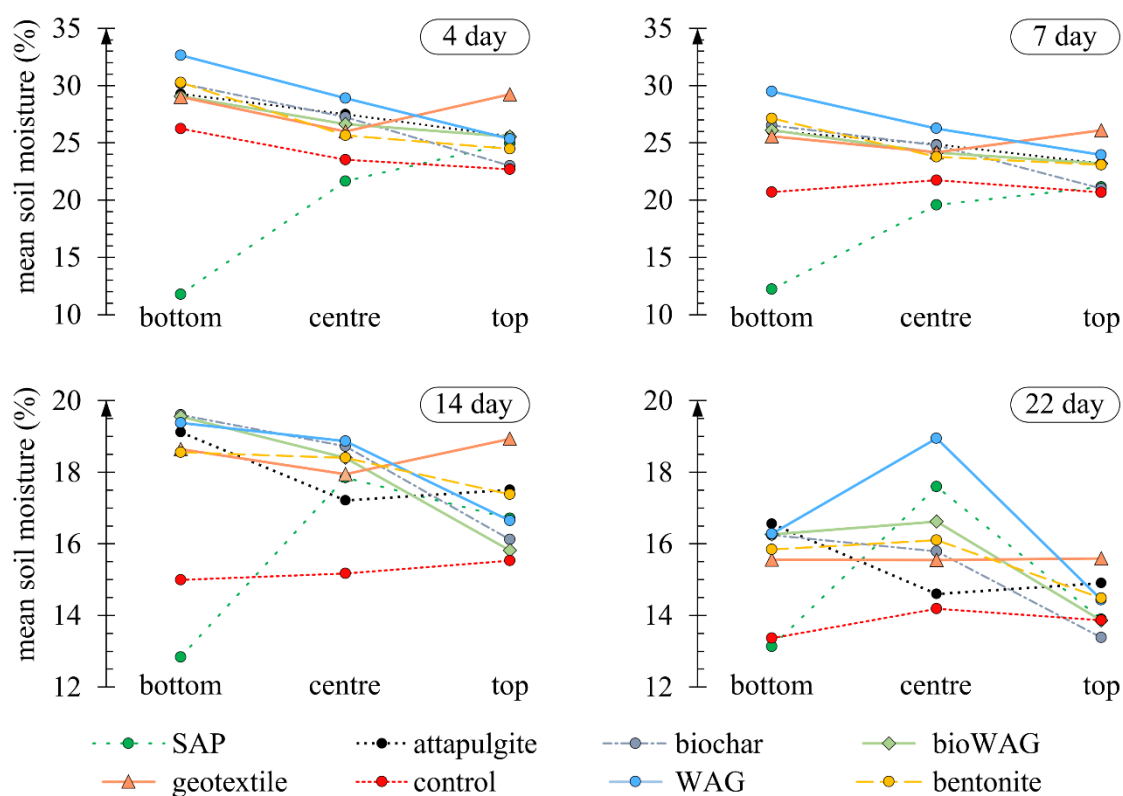

**Figure S20.** Mean soil moisture of pot samples at three depths of measurement (bottom, centre, top). Observations were taken during 22-day long drying cycles. Mean values were based on values of 3 sample replications and three repetitions of the experiment.
